# Supplementary material
Source: publisher figshare collection journal article supplement (https://sage.figshare.com/ndownloader/files/20045792)
Supplement: Supplementary file 1 [file 20045792]

**Table 1.** Professionals interviewed (n=43)

|                          | <b>Workplace</b> | <b>Interview code</b> | <b>Sex</b> | <b>Background</b>                    | <b>Professional Profile</b>  | <b>Area of work</b>         | <b>City</b> |
|--------------------------|------------------|-----------------------|------------|--------------------------------------|------------------------------|-----------------------------|-------------|
| <b>Social Services</b>   |                  | 1                     | Female     | Social Counsellor                    | Employment educator          | Shelter                     | Alicante    |
|                          |                  | 2                     | Female     | Psychologist                         | Psychologist                 | Shelter                     | Alicante    |
|                          |                  | 3                     | Female     | Psychologist                         | Educator                     | Shelter                     | Alicante    |
|                          |                  | 4                     | Female     | Social Counsellor                    | Child educator               | Shelter                     | Alicante    |
|                          |                  | 5                     | Female     | Social Worker                        | Social Worker                | Shelter                     | Alicante    |
|                          |                  | 6                     | Male       | Social Counsellor                    | Health educator              | Shelter                     | Alicante    |
|                          |                  | 11                    | Female     | Lawyer                               | Director                     | Shelter                     | Alicante    |
|                          |                  | 12                    | Female     | Social Worker                        | Social Worker                | Council equal opportunities | Alicante    |
|                          |                  | 24                    | Female     | Psychologist and Social Worker       | Psychologist and Director    | Community Centre            | Barcelona   |
|                          |                  | 25                    | Females    | Social Worker and Anthropologist     | IPV specialists              | Specialist IPV service      | Barcelona   |
|                          |                  | 28                    | Female     | Social Worker                        | Social Worker                | Specialist IPV service      | Madrid      |
|                          |                  | 29                    | Female     | Social Worker                        | Social Worker                | Specialist IPV service      | Madrid      |
|                          |                  | 30                    | Female     | Psychologist                         | Psychologist                 | Specialist IPV service      | Madrid      |
| <b>Associations/NGOs</b> |                  | 32                    | Female     | Psychologist                         | Coordinator                  | Specialist IPV service      | Barcelona   |
|                          |                  | 7                     | Females    | Social Worker and Sociologist        | Workforce entry coordinators | Women's association         | Alicante    |
|                          |                  | 8                     | Female     | Social Worker                        | Social Worker                | Women's association         | Alicante    |
|                          |                  | 9                     | Female     | Lawyer                               | Lawyer                       | Immigrant's association     | Alicante    |
|                          |                  | 10                    | Female     | Mediator                             | Lecturer                     | University                  | Alicante    |
|                          |                  | 13                    | Females    | 4 former IPV victims                 | Former IPV victims           | Women's association         | Alicante    |
|                          |                  | 14                    | Female     | Lawyer                               | Lawyer                       | Immigrant's association     | Alicante    |
|                          |                  | 15                    | Female     | Mediator                             | Mediator                     | Immigrant's association     | Alicante    |
|                          |                  | 16                    | Female     | Health provider                      | Health provider              | Immigrant's association     | Alicante    |
|                          |                  | 17                    | Female     | Lawyer                               | Lawyer                       | Immigrant's association     | Alicante    |
|                          |                  | 18                    | Female     | Psychologist                         | Psychologist                 | Immigrant's association     | Alicante    |
|                          |                  | 19                    | Female     | Social Worker                        | Social Worker                | Immigrant's association     | Alicante    |
| <b>Law/Police</b>        |                  | 20                    | Female     | Lawyer                               | Magistrate                   | Specialist IPV court        | Alicante    |
|                          |                  | 21                    | Female     | Police Officer                       | Police Officer               | Specialist IPV police       | Alicante    |
|                          |                  | 22                    | Male       | Police Officer                       | Police Officer               | Specialist IPV police       | Alicante    |
|                          |                  | 23                    | Male       | Lawyer                               | Lawyer                       | Specialist IPV police       | Alicante    |
|                          |                  | 26                    | Female     | Police Officer                       | Police Officer               | Specialist IPV court        | Alicante    |
|                          |                  | 27                    | Female     | Lawyer                               | Lawyer                       | Specialist IPV court        | Alicante    |
|                          |                  | 31                    | Females    | 2 Psychologists and 3 Social Workers | Psychologists Social Worker  | Specialist IPV court        | Madrid      |
|                          |                  | 33                    | Female     | Judge                                | Judge                        | Specialist IPV court        | Barcelona   |
